# Supplementary material for: Prediction of HIV-1 sensitivity to broadly neutralizing antibodies shows a trend towards resistance over time
Source: PLoS Comput Biol. 2017 Oct 24;13(10):e1005789. doi: 10.1371/journal.pcbi.1005789 (PMC5669501; doi:10.1371/journal.pcbi.1005789)
Supplement: S2 Table — The observed percentage of X4-capable and R5-tropic HIV-1 variants in the Los Alamos HIV sequence database over the six considered time-periods. The coreceptor usage was determined using the well-established prediction tool geno2pheno[coreceptor] using an FPR-cutoff of 10% as recommended by the European Consensus Group on clinical management of HIV-1 tropism testing, and the FPR-cutoff recommended by then German and Austrian treatment guidelines (≤ 5%: X4-capable; ≥ 15%: R5-tropic). (XLSX) [file pcbi.1005789.s008.xlsx]

## Sheet: S2 Table
S2 Table: Ratio of R5-tropic to X4-capable viruses in the LANL data
		Time period
X4 FPR-Cutoff	Subtype	81 - 86	87 - 91	92 - 95	96 - 99	00 - 05	06-13
FPR 5%/15%	all	2.08696	2.09302	4.01351	9.13405	8.34542	8.4379
FPR 5%/15%	B	2.11111	1.87542	3.94915	8.97934	6.61575	7.15094
FPR 5%/15%	nonB	1	18.25	4.26667	9.41985	11.4134	9.3642
FPR 10%	all	1.89583	2.0125	2.41288	4.57816	4.84636	4.84555
FPR 10%	B	1.89947	1.8474	2.27149	4.10152	3.88721	3.87092
FPR 10%	nonB	1.66667	6.25	3.13953	5.88837	6.58869	5.69972
FPR 20%	all	0.978648	1.30622	1.71386	2.28655	2.31864	2.34049
FPR 20%	B	0.985507	1.21465	1.6679	1.86597	1.79672	1.61351
FPR 20%	nonB	0.6	2.95455	1.91803	3.68671	3.24551	3.06009
The observed percentage of X4-capable and R5-tropic HIV-1 variants in the LANL data set over the six considered time-periods. The coreceptor usage was determined using the well-established prediction tool geno2pheno[coreceptor] using an FPR-cutoff of 10% as recommended by the European Consensus Group on clinical management of HIV-1 tropism testing, and the FPR-cutoff recommended by the German and…
