# Supplementary material for: Prediction of HIV-1 sensitivity to broadly neutralizing antibodies shows a trend towards resistance over time
Source: PLoS Comput Biol. 2017 Oct 24;13(10):e1005789. doi: 10.1371/journal.pcbi.1005789 (PMC5669501; doi:10.1371/journal.pcbi.1005789)
Supplement: S7 Table — For each bNAb we display the 1% strongest learnt signals (oligomers), their position compared to the HXB2 reference and the learnt weight. Negative weights denote associations towards resistance, while positive weights denote associations towards sensitivity. The weights for different classifiers are not comparable. Note that a gap signal implies an absence of a certain amino acid at a certain position. Especially if several amino acids are associated with sensitivity or resistance at a certain position, the gap character might be strongly associated with the other direction (resistance or sensitivity), even stronger than the individual amino acid signals. (XLSX) [file pcbi.1005789.s013.xlsx]

## Sheet: 3BNC117_1%DiscSignals
l-mer	HXB2 positions	HXB2 Aas	Normalized Weight	Association	To read as	Interpretation	Literature
"--"	"404-405"	"GS"	-0.000361056	RESISTANT	Loss of GS at 404	V4 loop 403 to 409 deletions associated with resistance (Loss of PNGS at 406)
"--"	"405-406"	"SN"	-0.000355701	RESISTANT	Loss of SN at 405	V4 loop 403 to 409 deletions associated with resistance (Loss of PNGS at 406)
"--"	"403-404"	"EG"	-0.000342697	RESISTANT	Loss of EG at 403	V4 loop 403 to 409 deletions associated with resistance (Loss of PNGS at 406)/Loss of glycan at 403 impreoves affinity	Jardine2013
"--"	"406-407"	"NN"	-0.000328437	RESISTANT	Loss of NN at 406	V4 loop 403 to 409 deletions associated with resistance (Loss of PNGS at 406)
"--"	"395_1-395_2"	"--"	0.000319048	SENSITIVE	no insertions after W395	Before PNGS at 397
"--"	"395_2-395_3"	"--"	0.000318429	SENSITIVE	no insertions after W395	Before PNGS at 397
"--"	"395-395_1"	"W-"	0.000308274	SENSITIVE	Loss of W at 395, or/and no insertion after W395	Before PNGS at 397
"--"	"395_3-395_4"	"--"	0.000304055	SENSITIVE	no insertions after between W395 and F396	Before PNGS at 397
"--"	"402-403"	"TE"	-0.000301282	RESISTANT	Loss of TE at 402	V4 loop 403 to 409 deletions associated with resistance (Loss of PNGS at 406?) Loss of ST at 401?
"--"	"394-395"	"TW"	0.000288821	SENSITIVE	Loss of TW at 394	Loss of PNGS at 392/ Before PNGS at 397
"--"	"407-408"	"NT"	-0.000283251	RESISTANT	Loss of NT at 407	Loss of PNGS at 406
"--"	"395_4-396"	"-F"	0.000274265	SENSITIVE	No insertion after W395, loss of F396	Before PNGS at 397
"--"	"393-394"	"ST"	0.000263452	SENSITIVE	Loss of ST at 393	Loss of PNGS at 392/ Before PNGS at 397
"--"	"186_5-186_6"	"--"	-0.000244038	RESISTANT	No insertions between N186 and D187/or shifted loss of N186	loss of PNGS N186/V2 hypervariable region
"--"	"186_6-186_7"	"--"	-0.000243941	RESISTANT	No insertions between N186 and D187/or shifted loss of N186	loss of PNGS N186/V2 hypervariable region
"--"	"186_4-186_5"	"--"	-0.000240523	RESISTANT	No insertions between N186 and D187/or shifted loss of N186	loss of PNGS N186/V2 hypervariable region
"--"	"186_7-186_8"	"--"	-0.000240055	RESISTANT	No insertions between N186 and D187/or shifted loss of N186	loss of PNGS N186/V2 hypervariable region
"--"	"401_1-402"	"-T"	-0.00023985	RESISTANT	No Insertion between S401 and T402/Loss of T402
"--"	"392-393"	"NS"	0.000234717	SENSITIVE	Loss of NS at 392	Loss of PNGS at 392
"--"	"186_3-186_4"	"--"	-0.000233686	RESISTANT	No insertions between N186 and D187/or shifted loss of N186	loss of PNGS N186/V2 hypervariable region
"--"	"186_8-186_9"	"--"	-0.000232399	RESISTANT	No insertions between N186 and D187/or shifted loss of N186	loss of PNGS N186/V2 hypervariable region
"--"	"396-397"	"FN"	0.000228431	SENSITIVE	Loss of FN at 396	Loss of PNGS at 397
"--"	"408-409"	"TE"	-0.000225698	RESISTANT	Loss of TE at 408	Loss of PNGS at 406
"--"	"186_2-186_3"	"--"	-0.000223862	RESISTANT	No insertions between N186 and D187/or shifted loss of N186	loss of PNGS N186/V2 hypervariable region
"--"	"186_9-186_10"	"--"	-0.000221251	RESISTANT	No insertions between N186 and D187/or shifted loss of N186	loss of PNGS N186/V2 hypervariable region
"--"	"186_1-186_2"	"--"	-0.00021138	RESISTANT	No insertions between N186 and D187/or shifted loss of N186	loss of PNGS N186/V2 hypervariable region
"--"	"186_10-186_11"	"--"	-0.00020717	RESISTANT	No insertions between N186 and D187/or shifted loss of N186	loss of PNGS N186/V2 hypervariable region
"--"	"391_5-392"	"-N"	0.000204777	SENSITIVE	loss of N392 (and previous insertion)	Loss of PNGS at 392
"II"	"270-271"	"VV"	0.000200576	SENSITIVE	V270I or V271I	I272 is important for sensitivity/close to 3BNC117 contacts
"II"	"271-272"	"VI"	0.000200536	SENSITIVE	V271I or I272I	I272 is important for sensitivity/close to 3BNC117 contacts
"--"	"133_7-133_8"	"--"	-0.000198428	RESISTANT	no insertions after D133/shifted loss of D133
"--"	"133_6-133_7"	"--"	-0.000197411	RESISTANT	no insertions after D133/shifted loss of D133
"--"	"186-186_1"	"N-"	-0.000196562	RESISTANT	Loss of N186	loss of PNGS N186/V2 hypervariable region
"--"	"133_8-133_9"	"--"	-0.00019421	RESISTANT	no insertions after D133/shifted loss of D133
"II"	"269-270"	"EV"	0.000192753	SENSITIVE	E269I or E270I	I272 is important for sensitivity/close to 3BNC117 contacts
"II"	"272-273"	"IR"	0.000192582	SENSITIVE	I272 or I273	I272 is important for sensitivity/close to 3BNC117 contacts
"--"	"186_11-186_12"	"--"	-0.000190968	RESISTANT	No insertions between N186 and D187/or shifted loss of N186	loss of PNGS N186/V2 hypervariable region
"--"	"133_5-133_6"	"--"	-0.000190946	RESISTANT	no insertions after D133/shifted loss of D133
"--"	"133_9-133_10"	"--"	-0.000185333	RESISTANT	no insertions after D133/shifted loss of D133
"--"	"185-186"	"DN"	-0.000179748	RESISTANT	Loss of D185	before PNGS at 186/Start of V2 hypervariable loop
"--"	"133_4-133_5"	"--"	-0.000179263	RESISTANT	no insertions after D133/shifted loss of D133
"II"	"268-269"	"EE"	0.000178003	SENSITIVE	E268I or E269I	I272 is important for sensitivity/close to 3BNC117 contacts

## Sheet: 35O22_1%DiscSignal
l-mer	HXB2 positions	HXB2 Aas	Normalized Weight	Association	To read as	Interpretation
"-----S-GY"	"138_5-142"	"-N----TNS"	-0.000231971	"RESISTANT"	Loss of N139 andN141G and S142Y	Loss of PNGS leads to resistance
"-----S-GY"	"149-151_1"	"ME-----K-"	-0.000220293	"RESISTANT"	Loss of ME at 149 and K151G	Loss of K151 associated with resistance
"-----S-GY"	"148-151"	"IME-----K"	-0.000215008	"RESISTANT"	Loss of ME at 149 and K151G
"-----S-GY"	"138_1-139_3"	"-----N---"	0.000210303	"SENSITIVE"
"-----S-GY"	"139-143"	"N----TNSS"	-0.00019403	"RESISTANT"	Loss of N139, Loss of N141, S142G,
"-----S-GY"	"147-150_5"	"MIME-----"	-0.000193848	"RESISTANT"
"-----S-GY"	"138_2-139_4"	"----N----"	0.000193212	"SENSITIVE"	Loss of PNGS at 139
"-----S-GY"	"150-151_2"	"E-----K--"	-0.00018544	"RESISTANT"	K151G
"YIKIFNHCQ"	"681-689"	"YIKLFIMIV"	0.00017918	"SENSITIVE"
"-----S-GY"	"133_3-133_11"	"---------"	0.000178442	"SENSITIVE"
"-----S-GY"	"133_4-134"	"--------L"	0.000177841	"SENSITIVE"
"-----S-GY"	"138-139_2"	"T-----N--"	0.000174428	"SENSITIVE"
"KIFILIMLW"	"683-691"	"KLFIMIVGG"	0.000172806	"SENSITIVE"
"-----S-GY"	"146-150_4"	"RMIME----"	-0.000170091	"RESISTANT"	Insertion of S-GY after RMIME at position 146
"-----S-GY"	"133_2-133_10"	"---------"	0.00016894	"SENSITIVE"
"-----S-GY"	"133_5-135"	"-------LK"	0.000167157	"SENSITIVE"
"-----S-GY"	"408-413_1"	"TEG--SDT-"	0.000164754	"SENSITIVE"
"-----S-GY"	"133_11-135_6"	"-LK------"	0.000164649	"SENSITIVE"
"-----S-GY"	"409-414"	"EG--SDT-I"	0.000160421	"SENSITIVE"
"IKIFKWSNF"	"682-690"	"IKLFIMIVG"	0.000160403	"SENSITIVE"
"-----S-GY"	"407-413"	"NTEG--SDT"	0.000160166	"SENSITIVE"
"-----S-GY"	"134-135_7"	"LK-------"	0.000158802	"SENSITIVE"
"-----S-GY"	"143-145_6"	"SSG------"	-0.000157472	"RESISTANT"	Shift of SG144
"-----S-GY"	"144-145_7"	"SG-------"	-0.000154719	"RESISTANT"	Shift of SG144
"-----S-GY"	"133_10-135_5"	"--LK-----"	0.000153765	"SENSITIVE"	Loss of K135
"-----S-GY"	"135_16-138_4"	"--NDT----"	0.000143437	"SENSITIVE"	Loss of PNGS at 136
"-----S-GY"	"137-139_1"	"DT-----N-"	0.000143205	"SENSITIVE"	Loss of PNGS at 136
"DVISFEVCF"	"107-115"	"DIISLWDQS"	-0.000142668	"RESISTANT"	I108V, LWDQS111SFEVCF
"VISLYCLS-"	"108-116"	"IISLWDQSL"	-0.000142668	"RESISTANT"	I108V, WDQ112YCL
"-----S-GY"	"133_6-135_1"	"------LK-"	0.000142186	"SENSITIVE"	Loss of K135
"-----S-GY"	"135_17-138_5"	"-NDT-----"	0.000142151	"SENSITIVE"	Loss of PNGS at 136
"-CDAAWQHN"	"27_1-32_1"	"-CSAT--E-"	-0.000141247	"RESISTANT"
"G---KGKKF"	"23-27_1"	"G---MLMI-"	0.000138262	"SENSITIVE"
"PGQTMGYFG"	"313-320_1"	"PGRAFVTI-"	-0.000138213	"RESISTANT"
"-----S-GY"	"135_15-138_3"	"---NDT---"	0.000138064	"SENSITIVE"	Loss of PNGS at 136
"FNMWLH-TN"	"93-101"	"FNMWKNDMV"	0.000137652	"SENSITIVE"
"-----S-GY"	"410-415"	"G--SDT-IT"	0.000137499	"SENSITIVE"
"GPGQPTPWE"	"312-320"	"GPGRAFVTI"	-0.000136985	"RESISTANT"
"-----S-GY"	"465_1-465_9"	"---------"	-0.000135921	"RESISTANT"
"-----S-GY"	"186_6-187"	"--------D"	-0.000135087	"RESISTANT"
"-----S-GY"	"136-139"	"NDT-----N"	0.000134865	"SENSITIVE"	Loss of PNGS at 136
"-----S-GY"	"142-145_5"	"SSSG-----"	-0.000133489	"RESISTANT"	Shift of SG144
"Q-Q-VLPTI"	"8-13"	"Q-H-LW-RW"	-0.000131968	"RESISTANT"
"-----S-GY"	"135_14-138_2"	"----NDT--"	0.000131529	"SENSITIVE"	Loss of PNGS at 136
"-----S-GY"	"145-145_8"	"G--------"	-0.000131361	"RESISTANT"
"-----S-GY"	"138_4-141"	"--N----TN"	-0.000130923	"RESISTANT"
"-----S-GY"	"465-465_8"	"S--------"	-0.000130763	"RESISTANT"
"EDVITRGSE"	"106-114"	"EDIISLWDQ"	-0.000130265	"RESISTANT"
"V-G-IKIFM"	"513-518_1"	"V-G-IGAL-"	0.000130221	"SENSITIVE"
"-----S-GY"	"145_10-150_3"	"-RMIME---"	-0.000128641	"RESISTANT"
"HEDVIDYDM"	"105-113"	"HEDIISLWD"	-0.000128605	"RESISTANT"
"-----S-GY"	"135-135_8"	"K--------"	0.000128392	"SENSITIVE"	Loss of K135
"-----S-GY"	"465_2-465_10"	"---------"	-0.000127921	"RESISTANT"
"IVHLDDEDA"	"285-293"	"IVQLNTSVE"	-0.00012632	"RESISTANT"
"MI-CRCRAI"	"26-31_2"	"MI-CSAT--"	-0.000125512	"RESISTANT"
"TTNVFYVDP"	"605-613"	"TTAVPWNAS"	0.000124431	"SENSITIVE"
"-----S-GY"	"786_2-788_1"	"------RR-"	0.000122598	"SENSITIVE"
"-----S-GY"	"133_9-135_4"	"---LK----"	0.000120458	"SENSITIVE"
"LWYIRWC-C"	"679-687"	"LWYIKLFIM"	-0.00011894	"RESISTANT"	Substitution of KLFIM683RWC-C
"YIKIFNHCQ"	"680-688"	"WYIKLFIMI"	0.00011853	"SENSITIVE"
"YIKIFNHCQ"	"682-690"	"IKLFIMIVG"	0.00011853	"SENSITIVE"
"RQGFEVKAY"	"848-855"	"RQGLE-RIL"	-0.000118232	"RESISTANT"	L851F, insertion of V after E852, Loss of RILL at 853
"QGFEVTRLD"	"849-856"	"QGLE-RILL"	-0.000118232	"RESISTANT"	L851F, insertion of V after E852, Loss of RILL at 853
"LWYIMNCNQ"	"679-687"	"LWYIKLFIM"	0.000118058	"SENSITIVE"
"WYIKLDIWQ"	"680-688"	"WYIKLFIMI"	0.000118058	"SENSITIVE"
"-----S-GY"	"150_1-151_3"	"-----K---"	-0.00011766	"RESISTANT"
"-----S-GY"	"133_1-133_9"	"---------"	0.000117078	"SENSITIVE"
"VQYWIYIAC"	"800-808"	"LQYWSQELK"	-0.000116951	"RESISTANT"

## Sheet: NIH-4546_1%DiscSignal
l-mer	HXB2 positions	HXB2 Aas	Normalized Weight	Association	To read as	Interpretation
"----"	"145-145_3"	"G---"	0.000115306	"SENSITIVE"	Loss of G145
"----"	"145_1-145_4"	"----"	0.000114468	"SENSITIVE"
"----"	"144-145_2"	"SG--"	0.000114346	"SENSITIVE"	Loss of SG144
"----"	"143-145_1"	"SSG-"	0.000111756	"SENSITIVE"	Loss of SG144
"----"	"145_2-145_5"	"----"	0.000111728	"SENSITIVE"	No insertions after G145
"----"	"142-145"	"SSSG"	0.000107761	"SENSITIVE"	Loss of SSSG142	Loss of PNGS at N141
"----"	"145_3-145_6"	"----"	0.000107054	"SENSITIVE"	No insertions after G145
"----"	"141-144"	"NSSS"	0.00010262	"SENSITIVE"	Loss of PNGS at N141
"----"	"145_4-145_7"	"----"	0.000100495	"SENSITIVE"	No insertions after G145
"----"	"140-143"	"TNSS"	9.66197e-05	"SENSITIVE"	Loss of PNGS at N141
"----"	"145_5-145_8"	"----"	9.21747e-05	"SENSITIVE"	No insertions after G145
"----"	"139_4-142"	"-TNS"	9.00532e-05	"SENSITIVE"	Loss of PNGS at N141
"----"	"139_3-141"	"--TN"	8.32066e-05	"SENSITIVE"	Loss of PNGS at N141
"----"	"145_6-145_9"	"----"	8.22926e-05	"SENSITIVE"	No insertions after G145
"----"	"139_2-140"	"---T"	7.63455e-05	"SENSITIVE"
"----"	"145_7-145_10"	"----"	7.1113e-05	"SENSITIVE"	No insertions after G145
"----"	"139_1-139_4"	"----"	6.97029e-05	"SENSITIVE"	No insertions after N139
"----"	"139-139_3"	"N---"	6.34707e-05	"SENSITIVE"	Loss of N139
"----"	"145_8-146"	"---R"	5.89534e-05	"SENSITIVE"	Loss of R146
"----"	"138_5-139_2"	"-N--"	5.77941e-05	"SENSITIVE"	Loss of N139
"----"	"465_2-465_5"	"----"	-5.44622e-05	"RESISTANT"	No insertions after S465/Loss of S465	Loss of PNGS at N463
"----"	"465_3-465_6"	"----"	-5.44557e-05	"RESISTANT"	No insertions after S465/Loss of S465	Loss of PNGS at N463
"----"	"465_4-465_7"	"----"	-5.36445e-05	"RESISTANT"	No insertions after S465/Loss of S465	Loss of PNGS at N463
"----"	"465_1-465_4"	"----"	-5.36399e-05	"RESISTANT"	No insertions after S465/Loss of S465	Loss of PNGS at N463
"----"	"138_4-139_1"	"--N-"	5.27687e-05	"SENSITIVE"
"----"	"465_5-465_8"	"----"	-5.20832e-05	"RESISTANT"	No insertions after S465/Loss of S465	Loss of PNGS at N463
"----"	"465-465_3"	"S---"	-5.19973e-05	"RESISTANT"	Loss of S465	Loss of PNGS at N463
"----"	"396-399"	"FNST"	5.05311e-05	"SENSITIVE"	Loss of PNGS at N397
"----"	"395_4-398"	"-FNS"	5.03556e-05	"SENSITIVE"	Loss of PNGS at N397
"----"	"397-400"	"NSTW"	5.00588e-05	"SENSITIVE"	Loss of PNGS at N397
"----"	"465_6-465_9"	"----"	-4.98525e-05	"RESISTANT"	No insertions after S465/Loss of S465	Loss of PNGS at N463
"----"	"464_1-465_2"	"-S--"	-4.95765e-05	"RESISTANT"	No insertions after S465/Loss of S465	Loss of PNGS at N463
"----"	"395_3-397"	"--FN"	4.95457e-05	"SENSITIVE"	Loss of FN396	Loss of PNGS at N397
"----"	"398-401"	"STWS"	4.89503e-05	"SENSITIVE"	Loss of STWS at 398	Loss of PNGS at N397
"----"	"138_3-139"	"---N"	4.8441e-05	"SENSITIVE"	Loss of N139	Loss of PNGS139
"----"	"395_2-396"	"---F"	4.81386e-05	"SENSITIVE"	Loss of F396	Loss of PNGS at N397?
"----"	"399-401_1"	"TWS-"	4.72424e-05	"SENSITIVE"	Loss of TWS399	Loss of PNGS139
"----"	"465_7-465_10"	"----"	-4.70537e-05	"RESISTANT"	No insertions after S465/Loss of S465	Loss of PNGS at N463
"----"	"151-151_3"	"K---"	-4.68227e-05	"RESISTANT"	Loss of K151
"----"	"150_5-151_2"	"-K--"	-4.65673e-05	"RESISTANT"	Loss of K151
"----"	"464-465_1"	"E-S-"	-4.64514e-05	"RESISTANT"	Loss of E464 and S465	Loss of PNGS at N463
"----"	"395_1-395_4"	"----"	4.6193e-05	"SENSITIVE"
"----"	"145_9-147"	"--RM"	4.61687e-05	"SENSITIVE"
"----"	"151_1-152"	"---G"	-4.59337e-05	"RESISTANT"	Loss of G152
"----"	"150_4-151_1"	"--K-"	-4.4996e-05	"RESISTANT"	Loss of K151
"----"	"400-402"	"WS-T"	4.49943e-05	"SENSITIVE"	Loss of WS-T at 400
"----"	"138_2-138_5"	"----"	4.48121e-05	"SENSITIVE"
"----"	"151_2-153"	"--GE"	-4.40928e-05	"RESISTANT"
"----"	"465_8-466"	"---E"	-4.38023e-05	"RESISTANT"
"----"	"395-395_3"	"W---"	4.37851e-05	"SENSITIVE"
"----"	"463-465"	"NE-S"	-4.27237e-05	"RESISTANT"	Loss of PNGS N463
"----"	"401-403"	"S-TE"	4.2285e-05	"SENSITIVE"
"----"	"150_3-151"	"---K"	-4.19708e-05	"RESISTANT"	Loss of K151
"----"	"138_1-138_4"	"----"	4.18427e-05	"SENSITIVE"
"----"	"151_3-154"	"-GEI"	-4.15027e-05	"RESISTANT"
"----"	"394-395_2"	"TW--"	4.10037e-05	"SENSITIVE"
"----"	"465_9-467"	"--EI"	-4.02213e-05	"RESISTANT"
"----"	"138-138_3"	"T---"	3.94607e-05	"SENSITIVE"
"----"	"401_1-404"	"-TEG"	3.92082e-05	"SENSITIVE"
"----"	"462-464_1"	"NNE-"	-3.85183e-05	"RESISTANT"		Loss of PNGS N463
"----"	"152-155"	"GEIK"	-3.83652e-05	"RESISTANT"
"----"	"393-395_1"	"STW-"	3.79453e-05	"SENSITIVE"
"----"	"137-138_2"	"DT--"	3.75699e-05	"SENSITIVE"
"----"	"150_2-150_5"	"----"	-3.73981e-05	"RESISTANT"
"----"	"465_10-467_1"	"-EI-"	-3.64344e-05	"RESISTANT"
"----"	"136-138_1"	"NDT-"	3.60589e-05	"SENSITIVE"
"----"	"402-405"	"TEGS"	3.58675e-05	"SENSITIVE"
"----"	"153-156"	"EIKN"	-3.48724e-05	"RESISTANT"	Loss of EIKN 153 or Loss of K155 and PNGS N156
"----"	"135_17-138"	"-NDT"	3.481e-05	"SENSITIVE"
"----"	"392-395"	"NSTW"	3.47083e-05	"SENSITIVE"
"DLEI"	"368-371"	"DPEI"	3.40893e-05	"SENSITIVE"
"----"	"461_2-464"	"-NNE"	-3.39757e-05	"RESISTANT"	Loss of NNE462	Loss of PNGS N463
"DLEI"	"367-370"	"GDPE"	3.38795e-05	"SENSITIVE"
"DLEI"	"369-372"	"PEIV"	3.38795e-05	"SENSITIVE"
"----"	"135_16-137"	"--ND"	3.37078e-05	"SENSITIVE"
"DLEI"	"366-369"	"GGDP"	3.32579e-05	"SENSITIVE"
"DLEI"	"370-373"	"EIVT"	3.32579e-05	"SENSITIVE"
"----"	"145_10-148"	"-RMI"	3.31337e-05	"SENSITIVE"
"----"	"135_15-136"	"---N"	3.2646e-05	"SENSITIVE"
"----"	"466-467_2"	"EI--"	-3.25605e-05	"RESISTANT"	Loss of EI466
"LEIT"	"369-372"	"PEIV"	3.23745e-05	"SENSITIVE"
"----"	"403-406"	"EGSN"	3.23699e-05	"SENSITIVE"
"DLEI"	"365-368"	"SGGD"	3.22471e-05	"SENSITIVE"
"DLEI"	"371-374"	"IVTH"	3.22471e-05	"SENSITIVE"
"LEIT"	"368-371"	"DPEI"	3.21753e-05	"SENSITIVE"
"LEIT"	"370-373"	"EIVT"	3.21753e-05	"SENSITIVE"
"LEIT"	"367-370"	"GDPE"	3.15849e-05	"SENSITIVE"
"LEIT"	"371-374"	"IVTH"	3.15849e-05	"SENSITIVE"
"----"	"135_14-135_17"	"----"	3.15335e-05	"SENSITIVE"
"----"	"391_5-394"	"-NST"	3.13885e-05	"SENSITIVE"
"----"	"150_1-150_4"	"----"	-3.12388e-05	"RESISTANT"
"----"	"154-157"	"IKNC"	-3.11996e-05	"RESISTANT"		Loss of PNGS N156
"DLEI"	"364_1-367"	"-SGG"	3.08834e-05	"SENSITIVE"
"DLEI"	"372-375"	"VTHS"	3.08834e-05	"SENSITIVE"
"LEIT"	"366-369"	"GGDP"	3.0625e-05	"SENSITIVE"
"LEIT"	"372-375"	"VTHS"	3.0625e-05	"SENSITIVE"
"RDGG"	"456-459"	"RDGG"	3.03272e-05	"SENSITIVE"
"----"	"135_13-135_16"	"----"	3.0298e-05	"SENSITIVE"
"RDGG"	"455-458"	"TRDG"	3.01406e-05	"SENSITIVE"
"RDGG"	"457-459_1"	"DGG-"	3.01406e-05	"SENSITIVE"
"RDGG"	"454-457"	"LTRD"	2.95876e-05	"SENSITIVE"
"RDGG"	"458-459_2"	"GG--"	2.95876e-05	"SENSITIVE"
"LEIT"	"365-368"	"SGGD"	2.93299e-05	"SENSITIVE"
"LEIT"	"373-376"	"THSF"	2.93299e-05	"SENSITIVE"
"----"	"461_1-463"	"--NN"	-2.9245e-05	"RESISTANT"
"DLEI"	"364-366"	"S-SG"	2.92144e-05	"SENSITIVE"
"DLEI"	"373-376"	"THSF"	2.92144e-05	"SENSITIVE"
"----"	"135_12-135_15"	"----"	2.88884e-05	"SENSITIVE"
"----"	"404-407"	"GSNN"	2.88209e-05	"SENSITIVE"
"----"	"467-467_3"	"I---"	-2.8708e-05	"RESISTANT"	Loss of I467
"RDGG"	"453-456"	"LLTR"	2.86883e-05	"SENSITIVE"
"RDGG"	"459-459_3"	"G---"	2.86883e-05	"SENSITIVE"
"----"	"391_4-393"	"--NS"	2.80744e-05	"SENSITIVE"
"LEIT"	"364_1-367"	"-SGG"	2.77449e-05	"SENSITIVE"
"LEIT"	"374-377"	"HSFN"	2.77449e-05	"SENSITIVE"
"----"	"155-158"	"KNCS"	-2.75003e-05	"RESISTANT"	Loss of K155 and PNGS NCS156
"RDGG"	"452-455"	"LLLT"	2.74751e-05	"SENSITIVE"
"RDGG"	"459_1-459_4"	"----"	2.74751e-05	"SENSITIVE"
"DLEI"	"363-365"	"QS-S"	2.72966e-05	"SENSITIVE"
"DLEI"	"374-377"	"HSFN"	2.72966e-05	"SENSITIVE"
"----"	"135_11-135_14"	"----"	2.72754e-05	"SENSITIVE"
"NGTG"	"234-237"	"NGTG"	-2.60464e-05	"RESISTANT"		Escape PNGS NGT or Shift of PNGS at 234
"FNGT"	"233-236"	"FNGT"	-2.60464e-05	"RESISTANT"		Escape PNGS NGT or Shift of PNGS at 234
"RDGG"	"451-454"	"GLLL"	2.59903e-05	"SENSITIVE"
"RDGG"	"459_2-459_5"	"----"	2.59903e-05	"SENSITIVE"
"LEIT"	"364-366"	"S-SG"	2.59235e-05	"SENSITIVE"
"LEIT"	"375-378"	"SFNC"	2.59235e-05	"SENSITIVE"
"NGTG"	"233-236"	"FNGT"	-2.58862e-05	"RESISTANT"		Escape PNGS NGT or Shift of PNGS at 234
"NGTG"	"235-238"	"GTGP"	-2.58862e-05	"RESISTANT"		Escape PNGS NGT or Shift of PNGS at 234
"FNGT"	"232-235"	"TFNG"	-2.58862e-05	"RESISTANT"		Escape PNGS NGT or Shift of PNGS at 234
"FNGT"	"234-237"	"NGTG"	-2.58862e-05	"RESISTANT"		Escape PNGS NGT or Shift of PNGS at 234
"----"	"135_10-135_13"	"----"	2.54505e-05	"SENSITIVE"
"NGTG"	"232-235"	"TFNG"	-2.54112e-05	"RESISTANT"		Escape PNGS NGT or Shift of PNGS at 234
"NGTG"	"236-239"	"TGPC"	-2.54112e-05	"RESISTANT"		Escape PNGS NGT or Shift of PNGS at 241
"FNGT"	"231-234"	"KTFN"	-2.54112e-05	"RESISTANT"		Escape PNGS NGT or Shift of PNGS at 241
"FNGT"	"235-238"	"GTGP"	-2.54112e-05	"RESISTANT"		Escape PNGS NGT or Shift of PNGS at 241
"----"	"405-408"	"SNNT"	2.53187e-05	"SENSITIVE"
"DLEI"	"362_1-364_1"	"-QS-"	2.51917e-05	"SENSITIVE"
"DLEI"	"375-378"	"SFNC"	2.51917e-05	"SENSITIVE"
"----"	"467_1-468"	"---F"	-2.49715e-05	"RESISTANT"	Loss of F468
"----"	"391_3-392"	"---N"	2.48439e-05	"SENSITIVE"
"RKSI"	"304-307"	"RKRI"	2.46428e-05	"SENSITIVE"
"NGTG"	"231-234"	"KTFN"	-2.46389e-05	"RESISTANT"		Escape PNGS NGT or Shift of PNGS at 234
"NGTG"	"237-240"	"GPCT"	-2.46389e-05	"RESISTANT"		Escape PNGS NGT or Shift of PNGS at 234
"FNGT"	"230-233"	"NKTF"	-2.46389e-05	"RESISTANT"		Escape PNGS NGT or Shift of PNGS at 234
"FNGT"	"236-239"	"TGPC"	-2.46389e-05	"RESISTANT"		Escape PNGS NGT or Shift of PNGS at 234
"RKSI"	"303-306"	"TRKR"	2.44911e-05	"SENSITIVE"
"RKSI"	"305-308"	"KRIR"	2.44911e-05	"SENSITIVE"
"----"	"461-462"	"S--N"	-2.44753e-05	"RESISTANT"
"DLEV"	"368-371"	"DPEI"	-2.44326e-05	"RESISTANT"	P369L and I371V
"RDGG"	"450-453"	"TGLL"	2.42842e-05	"SENSITIVE"
"RDGG"	"459_3-459_6"	"----"	2.42842e-05	"SENSITIVE"
"DLEV"	"367-370"	"GDPE"	-2.42823e-05	"RESISTANT"
"DLEV"	"369-372"	"PEIV"	-2.42823e-05	"RESISTANT"
"RKSI"	"302-305"	"NTRK"	2.40417e-05	"SENSITIVE"
"RKSI"	"306-309"	"RIRI"	2.40417e-05	"SENSITIVE"
"LEIT"	"363-365"	"QS-S"	2.39245e-05	"SENSITIVE"
"LEIT"	"376-379"	"FNCG"	2.39245e-05	"SENSITIVE"
"----"	"156-159"	"NCSF"	-2.39029e-05	"RESISTANT"
"DLEV"	"366-369"	"GGDP"	-2.38368e-05	"RESISTANT"
"DLEV"	"370-373"	"EIVT"	-2.38368e-05	"RESISTANT"
"LDIV"	"179-182"	"LDII"	2.36855e-05	"SENSITIVE"
"S-SG"	"364-366"	"S-SG"	2.36462e-05	"SENSITIVE"
"NGTG"	"230-233"	"NKTF"	-2.35969e-05	"RESISTANT"		Escape PNGS NGT or Shift of PNGS at 234
"NGTG"	"238-241"	"PCTN"	-2.35969e-05	"RESISTANT"		Escape PNGS NGT or Shift of PNGS at 234
"FNGT"	"229-232"	"NNKT"	-2.35969e-05	"RESISTANT"		Escape PNGS NGT or Shift of PNGS at 234
"FNGT"	"237-240"	"GPCT"	-2.35969e-05	"RESISTANT"		Escape PNGS NGT or Shift of PNGS at 234
"LDIV"	"178-181"	"KLDI"	2.35397e-05	"SENSITIVE"
"LDIV"	"180-183"	"DIIP"	2.35397e-05	"SENSITIVE"
"----"	"150-150_3"	"E---"	-2.35156e-05	"RESISTANT"	Loss of E150
"S-SG"	"363-365"	"QS-S"	2.35007e-05	"SENSITIVE"
"S-SG"	"364_1-367"	"-SGG"	2.35007e-05	"SENSITIVE"
"----"	"135_9-135_12"	"----"	2.34238e-05	"SENSITIVE"
"RKSI"	"301-304"	"NNTR"	2.3311e-05	"SENSITIVE"
"RKSI"	"307-310"	"IRIQ"	2.3311e-05	"SENSITIVE"
"DLEV"	"365-368"	"SGGD"	-2.31123e-05	"RESISTANT"
"DLEV"	"371-374"	"IVTH"	-2.31123e-05	"RESISTANT"
"LDIV"	"177-180"	"YKLD"	2.31078e-05	"SENSITIVE"
"LDIV"	"181-184"	"IIPI"	2.31078e-05	"SENSITIVE"
"S-SG"	"362_1-364_1"	"-QS-"	2.30695e-05	"SENSITIVE"
"S-SG"	"365-368"	"SGGD"	2.30695e-05	"SENSITIVE"
"NLTD"	"276-279"	"NFTD"	2.30273e-05	"SENSITIVE"
"LTDN"	"277-280"	"FTDN"	2.30273e-05	"SENSITIVE"
"DLEI"	"362-364"	"K-QS"	2.29639e-05	"SENSITIVE"
"DLEI"	"376-379"	"FNCG"	2.29639e-05	"SENSITIVE"
"NLTD"	"275-278"	"VNFT"	2.28856e-05	"SENSITIVE"
"LTDN"	"276-279"	"NFTD"	2.28856e-05	"SENSITIVE"
"NLTD"	"277-280"	"FTDN"	2.28856e-05	"SENSITIVE"
"LTDN"	"278-281"	"TDNA"	2.28856e-05	"SENSITIVE"
"NLTD"	"274-277"	"SVNF"	2.24657e-05	"SENSITIVE"
"LTDN"	"275-278"	"VNFT"	2.24657e-05	"SENSITIVE"
"NLTD"	"278-281"	"TDNA"	2.24657e-05	"SENSITIVE"
"LTDN"	"279-282"	"DNAK"	2.24657e-05	"SENSITIVE"
"RDGG"	"449-452"	"ITGL"	2.24116e-05	"SENSITIVE"
"RDGG"	"459_4-460"	"---N"	2.24116e-05	"SENSITIVE"
"LDIV"	"176-179"	"FYKL"	2.24055e-05	"SENSITIVE"
"LDIV"	"182-184_1"	"IPI-"	2.24055e-05	"SENSITIVE"
"S-SG"	"362-364"	"K-QS"	2.23683e-05	"SENSITIVE"
"S-SG"	"366-369"	"GGDP"	2.23683e-05	"SENSITIVE"
"RKSI"	"300-303"	"NNNT"	2.23252e-05	"SENSITIVE"
"RKSI"	"308-311"	"RIQR"	2.23252e-05	"SENSITIVE"
"NGTG"	"229-232"	"NNKT"	-2.23217e-05	"RESISTANT"		Escape PNGS NGT or Shift of PNGS at 234
"NGTG"	"239-242"	"CTNV"	-2.23217e-05	"RESISTANT"		Escape PNGS NGT or Shift of PNGS at 234
"FNGT"	"228-231"	"CNNK"	-2.23217e-05	"RESISTANT"		Escape PNGS NGT or Shift of PNGS at 234
"FNGT"	"238-241"	"PCTN"	-2.23217e-05	"RESISTANT"		Escape PNGS NGT or Shift of PNGS at 234
"KCND"	"227-230"	"KCNN"	2.21698e-05	"SENSITIVE"
"DLEV"	"364_1-367"	"-SGG"	-2.21349e-05	"RESISTANT"
"DLEV"	"372-375"	"VTHS"	-2.21349e-05	"RESISTANT"
"KCND"	"226-229"	"LKCN"	2.20333e-05	"SENSITIVE"
"KCND"	"228-231"	"CNNK"	2.20333e-05	"SENSITIVE"
"----"	"406-409"	"NNTE"	2.195e-05	"SENSITIVE"
"LEIT"	"362_1-364_1"	"-QS-"	2.18087e-05	"SENSITIVE"
"LEIT"	"377-380"	"NCGG"	2.18087e-05	"SENSITIVE"
"NLTD"	"273-276"	"RSVN"	2.17829e-05	"SENSITIVE"		new PNGS NLT?
"LTDN"	"274-277"	"SVNF"	2.17829e-05	"SENSITIVE"		new PNGS NLT?
"NLTD"	"279-282"	"DNAK"	2.17829e-05	"SENSITIVE"		new PNGS NLT?
"LTDN"	"280-283"	"NAKT"	2.17829e-05	"SENSITIVE"		new PNGS NLT?
"----"	"391_2-391_5"	"----"	2.17616e-05	"SENSITIVE"
"LVNG"	"748-751"	"LVNG"	2.16604e-05	"SENSITIVE"
"KCND"	"225-228"	"ILKC"	2.16291e-05	"SENSITIVE"
"KCND"	"229-232"	"NNKT"	2.16291e-05	"SENSITIVE"
"LVNG"	"747-750"	"RLVN"	2.15271e-05	"SENSITIVE"
"LVNG"	"749-752"	"VNGS"	2.15271e-05	"SENSITIVE"
"KNEK"	"655-658"	"KNEQ"	-2.15049e-05	"RESISTANT"	Q658K
"LDIV"	"175-178"	"FFYK"	2.1458e-05	"SENSITIVE"
"LDIV"	"183-185"	"PI-D"	2.1458e-05	"SENSITIVE"
"----"	"467_2-469"	"--FR"	-2.14285e-05	"RESISTANT"
"S-SG"	"361-363"	"FK-Q"	2.14224e-05	"SENSITIVE"
"S-SG"	"367-370"	"GDPE"	2.14224e-05	"SENSITIVE"
"KNEK"	"654-657"	"EKNE"	-2.13726e-05	"RESISTANT"
"KNEK"	"656-659"	"NEQE"	-2.13726e-05	"RESISTANT"		Shift of K655
"GGGD"	"471-474"	"GGGD"	2.13294e-05	"SENSITIVE"
"IIRS"	"271-274"	"VIRS"	2.12974e-05	"SENSITIVE"
"----"	"135_8-135_11"	"----"	2.12208e-05	"SENSITIVE"
"GGGD"	"470-473"	"PGGG"	2.11981e-05	"SENSITIVE"
"GGGD"	"472-475"	"GGDM"	2.11981e-05	"SENSITIVE"
"IIRS"	"270-273"	"VVIR"	2.11664e-05	"SENSITIVE"
"IIRS"	"272-275"	"IRSV"	2.11664e-05	"SENSITIVE"
"LVNG"	"746-749"	"IRLV"	2.11321e-05	"SENSITIVE"
"LVNG"	"750-753"	"NGSL"	2.11321e-05	"SENSITIVE"
"RKSI"	"299-302"	"PNNN"	2.11188e-05	"SENSITIVE"
"RKSI"	"309-312"	"IQRG"	2.11188e-05	"SENSITIVE"
"KNEK"	"653-656"	"QEKN"	-2.09804e-05	"RESISTANT"
"KNEK"	"657-660"	"EQEL"	-2.09804e-05	"RESISTANT"
"KCND"	"224-227"	"AILK"	2.09717e-05	"SENSITIVE"
"KCND"	"230-233"	"NKTF"	2.09717e-05	"SENSITIVE"
"DLEV"	"364-366"	"S-SG"	-2.09387e-05	"RESISTANT"
"DLEV"	"373-376"	"THSF"	-2.09387e-05	"RESISTANT"
"NLTD"	"272-275"	"IRSV"	2.08617e-05	"SENSITIVE"		new PNGS NLT?
"LTDN"	"273-276"	"RSVN"	2.08617e-05	"SENSITIVE"		new PNGS NLT?
"NLTD"	"280-283"	"NAKT"	2.08617e-05	"SENSITIVE"		new PNGS NLT?
"LTDN"	"281-284"	"AKTI"	2.08617e-05	"SENSITIVE"		new PNGS NLT?
"NGTG"	"228-231"	"CNNK"	-2.08564e-05	"RESISTANT"		escape PNGS NGT?
"NGTG"	"240-243"	"TNVS"	-2.08564e-05	"RESISTANT"		escape PNGS NGT?
"FNGT"	"227-230"	"KCNN"	-2.08564e-05	"RESISTANT"		escape PNGS NGT?
"FNGT"	"239-242"	"CTNV"	-2.08564e-05	"RESISTANT"		escape PNGS NGT?
"GGGD"	"469-472"	"RPGG"	2.08091e-05	"SENSITIVE"
"GGGD"	"473-476"	"GDMR"	2.08091e-05	"SENSITIVE"
"IIRS"	"269-272"	"EVVI"	2.0778e-05	"SENSITIVE"
"IIRS"	"273-276"	"RSVN"	2.0778e-05	"SENSITIVE"
"NFNM"	"92-95"	"NFNM"	-2.07125e-05	"RESISTANT"		NFNM associated with resistance
"DLEI"	"361-363"	"FK-Q"	2.06762e-05	"SENSITIVE"
"DLEI"	"377-380"	"NCGG"	2.06762e-05	"SENSITIVE"
"NFNM"	"91-94"	"ENFN"	-2.05851e-05	"RESISTANT"		shift of NFNM or NFNM associated with resistance
"NFNM"	"93-96"	"FNMW"	-2.05851e-05	"RESISTANT"		shift of NFNM or NFNM associated with resistance
"N---"	"465-465_3"	"S---"	-2.05792e-05	"RESISTANT"	S465N	Loss of PNGS463 or shift
"----"	"157-160"	"CSFN"	-2.05104e-05	"RESISTANT"
"N---"	"464_1-465_2"	"-S--"	-2.05026e-05	"RESISTANT"
"LVNG"	"745-748"	"SIRL"	2.04898e-05	"SENSITIVE"
"LVNG"	"751-754"	"GSLA"	2.04898e-05	"SENSITIVE"
"RDGG"	"448-451"	"NITG"	2.04296e-05	"SENSITIVE"
"RDGG"	"459_5-461"	"--NS"	2.04296e-05	"SENSITIVE"
"N---"	"465_1-465_4"	"----"	-2.04213e-05	"RESISTANT"	Insertion of N after S465?
"KNEK"	"652-655"	"QQEK"	-2.03428e-05	"RESISTANT"		escape PNGS at 653?
"KNEK"	"658-661"	"QELL"	-2.03428e-05	"RESISTANT"
"ENIT"	"275-278"	"VNFT"	2.03074e-05	"SENSITIVE"		synonymous mutations, PNGS in intact
"LDIV"	"174-177"	"AFFY"	2.02984e-05	"SENSITIVE"
"LDIV"	"184-186"	"I-DN"	2.02984e-05	"SENSITIVE"
"S-SG"	"360-362_1"	"IFK-"	2.02647e-05	"SENSITIVE"
"S-SG"	"368-371"	"DPEI"	2.02647e-05	"SENSITIVE"
"ENIT"	"274-277"	"SVNF"	2.02461e-05	"SENSITIVE"
"----"	"146-149"	"RMIM"	2.02251e-05	"SENSITIVE"
"NFNM"	"90-93"	"TENF"	-2.02074e-05	"RESISTANT"		shift of NFNM or NFNM associated with resistance
"NFNM"	"94-97"	"NMWK"	-2.02074e-05	"RESISTANT"		shift of NFNM or NFNM associated with resistance
"N---"	"464-465_1"	"E-S-"	-2.01961e-05	"RESISTANT"	E464N and Loss of S465	Loss of PNGS 463
"GGGD"	"468-471"	"FRPG"	2.01767e-05	"SENSITIVE"
"GGGD"	"474-477"	"DMRD"	2.01767e-05	"SENSITIVE"
"IIRS"	"268-271"	"EEVV"	2.01465e-05	"SENSITIVE"
"IIRS"	"274-277"	"SVNF"	2.01465e-05	"SENSITIVE"
"ENIT"	"276-279"	"NFTD"	2.0124e-05	"SENSITIVE"
"KCND"	"223-226"	"FAIL"	2.00848e-05	"SENSITIVE"
"KCND"	"231-234"	"KTFN"	2.00848e-05	"SENSITIVE"
"N---"	"465_2-465_5"	"----"	-2.00328e-05	"RESISTANT"	Insertion of N after S465?	Shift of N463?
"FE-A"	"851-853"	"LE-R"	-1.99536e-05	"RESISTANT"
"ENIT"	"273-276"	"RSVN"	1.99428e-05	"SENSITIVE"		FE-A insertions associated with resistance
"LICT"	"602-605"	"LICT"	1.98426e-05	"SENSITIVE"		LICT602 important for sensitivity, even when shifted
"FE-A"	"850-852_1"	"GLE-"	-1.98308e-05	"RESISTANT"		FE-A insertions associated with resistance
"FE-A"	"852-854"	"E-RI"	-1.98308e-05	"RESISTANT"		FE-A insertions associated with resistance
"----"	"460-461_2"	"NS--"	-1.98083e-05	"RESISTANT"	Loss of NS460
"NLTD"	"271-274"	"VIRS"	1.97343e-05	"SENSITIVE"		new PNGS at 282? Confers sensitivity?
"LTDN"	"272-275"	"IRSV"	1.97343e-05	"SENSITIVE"		new PNGS at 282? Confers sensitivity?
"NLTD"	"281-284"	"AKTI"	1.97343e-05	"SENSITIVE"		new PNGS at 282? Confers sensitivity?
"LTDN"	"282-285"	"KTII"	1.97343e-05	"SENSITIVE"		new PNGS at 282? Confers sensitivity?
"RKSI"	"298-301"	"RPNN"	1.97324e-05	"SENSITIVE"
"RKSI"	"310-313"	"QRGP"	1.97324e-05	"SENSITIVE"
"----"	"181-184"	"IIPI"	-1.97291e-05	"RESISTANT"	Loss of IIPI181
"LICT"	"601-604"	"KLIC"	1.97205e-05	"SENSITIVE"		LICT602 important for sensitivity, even when shifted
"LICT"	"603-606"	"ICTT"	1.97205e-05	"SENSITIVE"		LICT602 important for sensitivity, even when shifted
"WQEV"	"427-430"	"WQKV"	1.97107e-05	"SENSITIVE"		QEV428 important for sensitivity even when shifted and K429E
"QEVG"	"428-431"	"QKVG"	1.97107e-05	"SENSITIVE"		QEV428 important for sensitivity even when shifted and K429E
"ENIT"	"277-280"	"FTDN"	1.97022e-05	"SENSITIVE"
"N---"	"463-465"	"NE-S"	-1.96721e-05	"RESISTANT"	Loss of NE-S at 463,	Loss of PNGS N463
"LEIT"	"362-364"	"K-QS"	1.96361e-05	"SENSITIVE"
"LEIT"	"378-381"	"CGGE"	1.96361e-05	"SENSITIVE"
"LVNG"	"744-747"	"RSIR"	1.96233e-05	"SENSITIVE"
"LVNG"	"752-755"	"SLAL"	1.96233e-05	"SENSITIVE"
"NFNM"	"89-92"	"VTEN"	-1.95932e-05	"RESISTANT"
"NFNM"	"95-98"	"MWKN"	-1.95932e-05	"RESISTANT"
"WQEV"	"426-429"	"MWQK"	1.95894e-05	"SENSITIVE"		QEV428 important for sensitivity even when shifted and K429E
"QEVG"	"427-430"	"WQKV"	1.95894e-05	"SENSITIVE"		QEV428 important for sensitivity even when shifted and K429E
"WQEV"	"428-431"	"QKVG"	1.95894e-05	"SENSITIVE"		QEV428 important for sensitivity even when shifted and K429E

## Sheet: PG9_1%DiscSignal
l-mer	HXB2 positions	HXB2 Aas	Normalized Weight	Association	To read as	Interpretation
"-"	"461"	"S"	0.00157274	"SENSITIVE"	Loss of S461	V5 loop/Loss of PNGS at N460
"-"	"400"	"W"	0.00146841	"SENSITIVE"	Loss of W400	V5 loop
"N"	"160"	"N"	0.00143647	"SENSITIVE"	N160	PG9 glycan contact/Loss leads to resistance
"-"	"461_1"	"-"	0.00143401	"SENSITIVE"	No insertions after S461/shifted loss of S461
"F"	"716"	"S"	0.00132014	"SENSITIVE"	S716F	change in cytoplasmic tail
"S"	"611"	"N"	0.00130544	"SENSITIVE"	N611S	Loss of PNGS at N611
"-"	"787_3"	"-"	-0.00125243	"RESISTANT"	No insertions after R787
"-"	"787_2"	"-"	-0.00125238	"RESISTANT"	No insertions after R787

## Sheet: PG16_1%DiscSignal
l-mer	HXB2 positions	HXB2 Aas	Normalized Weight	Association	To read as	Interpretation	Literature
"K"	"171"	"K"	0.00210891	"SENSITIVE"	K171	PG9 contact residue	West 2013, McLellan 2011,
"N"	"160"	"N"	0.00188392	"SENSITIVE"	N160	PG9 contact residue	Chuang2013, Chuang 2014, McLellan2011, DoriaRose2012, West 2013
"N"	"461_1"	"-"	-0.00151331	"RESISTANT"	Insertion of N after 461S	shifted PNGS, end beta23/start of V5 loop
"M"	"154"	"I"	-0.00135671	"RESISTANT"	I154M	resistance mutation?
"F"	"316"	"A"	0.00135671	"SENSITIVE"	A316F	V3-crown, shift of F317 , importance of F317 for sensitivity
"L"	"618"	"S"	-0.00134566	"RESISTANT"	S618L	Loss of PNGS at 616 leads to resistance
"F"	"850"	"G"	0.00134566	"SENSITIVE"	G850F

## Sheet: 10-996_1%DiscSignal
l-mer	HXB2 positions	HXB2 Aas	Normalized Weight	Association	To read as	Interpretation	Literature
"S"	"334"	"S"	0.00175359	"SENSITIVE"	S334	intact PNGS at N332
"N"	"334"	"S"	-0.00134384	"RESISTANT"	N334S	shifted PNGS from N332 to N334
"-"	"150"	"E"	0.00130181	"SENSITIVE"	Loss of E150	V1 hypervariable loop
"-"	"133_12"	"-"	0.00130155	"SENSITIVE"	no insertions at D133
"S"	"335"	"R"	0.00124839	"SENSITIVE"	S335R	Shifted PNGS at N332
"H"	"330"	"H"	0.00123767	"SENSITIVE"	H330	H330 increases sensitivity	West 2013
"Y"	"330"	"H"	-0.00123767	"RESISTANT"	H330Y	Loss of H330 associated with resistance
"N"	"332"	"N"	0.00120524	"SENSITIVE"	N332	intact PNGS, binding site of 10-996	West 2013

## Sheet: 10-1074_1%DiscSignal
l-mer	HXB2 positions	HXB2 Aas	Normalized Weight	Association	To read as	Interpretation	Literature
"S"	"334"	"S"	0.00187627	"SENSITIVE"	S334	intact PNGS at N332
"N"	"334"	"S"	-0.00162116	"RESISTANT"	S334N	shifted PNGS from N332 to N334
"H"	"330"	"H"	0.00158254	"SENSITIVE"	H330	H330 increases sensitivity	West 2013
"Y"	"330"	"H"	-0.00141367	"RESISTANT"	H330Y	Loss of H330 associated with resistance
"N"	"332"	"N"	0.0013841	"SENSITIVE"	N332	intact PNGS, binding site of 10-996	West 2013
"-"	"133_4"	"-"	-0.00123229	"RESISTANT"	No insertion after D133
"P"	"363"	"Q"	-0.00120852	"RESISTANT"	Q363P	resistance mutation, directly before CD4 binding loop

## Sheet: VRC01_1%DiscSignals
l-mer	HXB2 positions	HXB2 Aas	Normalized Weight	Association	To read as	Interpretation
"--"	"395_1-395_2"	"--"	0.000621827	SENSITIVE	no insertions after W395	W395 important for closeby PNGS 397
"II"	"271-272"	"VI"	0.000585698	SENSITIVE	V271I	Either a nonsynonymous mutation or the importance of I272 for sensitivity
"--"	"395-395_1"	"W-"	0.00057308	SENSITIVE	Loss of W395/or no insertion after W395
"II"	"270-271"	"VV"	0.000549779	SENSITIVE	V270I and V271I	Either a nonsynonymous mutation or the importance of I272 for sensitivity
"--"	"149-150"	"ME"	-0.000538323	RESISTANT	Loss of ME	Loss of ME at 149/150 associated with resistance
"--"	"395_2-395_3"	"--"	0.00052941	SENSITIVE	no insertions after W395/or shift of loss of W395
"--"	"401-401_1"	"S-"	0.000504194	SENSITIVE	Loss of S401
"--"	"150-150_1"	"E-"	-0.00049829	RESISTANT	Loss of E150	Loss of E150 confers resistance?
"--"	"148-149"	"IM"	-0.000479066	RESISTANT	Loss of IM149/149	associated with resistance
"--"	"400-401"	"WS"	0.00046523	SENSITIVE	Loss of WS at 400/401	Loss of WS associated with sensitivity
"KK"	"169-170"	"VQ"	-0.000458572	RESISTANT	V169K and Q170K	V169K and Q170K new resistance mutations
"KK"	"168-169"	"KV"	-0.000443383	RESISTANT	K168 and V169K	V169K new resistance mutation
"--"	"185-185_1"	"D-"	-0.0004388	RESISTANT	Loss of D185/ no insertion after D185	potentially interfers with PNGS N186
"--"	"394_1-395"	"-W"	0.000432421	SENSITIVE	Loss of W395/or no insertion before W395
"--"	"142-143"	"SS"	0.000427162	SENSITIVE	Loss of S142 and S143	loss of PNGS N141 associated with sensitivity
"--"	"143-144"	"SS"	0.00041404	SENSITIVE	Loss of S143 and S144	loss of PNGS N141 associated with sensitivity
"--"	"401_1-402"	"-T"	0.000404059	SENSITIVE	Loss of T402
"--"	"185_1-185_2"	"--"	-0.000403252	RESISTANT	no insertions after D133/shifted loss of D185
"--"	"141-142"	"NS"	0.000392556	SENSITIVE	Loss of N141 and S142	Loss of PNGS at N141
"II"	"272-273"	"IR"	0.000382751	SENSITIVE	I272 and R273I	Either a nonsynonymous mutation or the importance of I272 for sensitivity
"--"	"150_1-151"	"-K"	-0.000377013	RESISTANT	No insertions before K151/Loss of K151	Loss of K151 associated with resistance
"--"	"144-145"	"SG"	0.000373599	SENSITIVE	Loss of S144 and G145	Loss of S associated with sensitivity, maybe it influence the PNGS at N141

## Sheet: PGT121_1%DiscSignal
l-mer	HXB2 positions	HXB2 Aas	Normalized Weight	Association	To read as	Interpretation
"-----A"	"141-146"	"NSSSGR"	0.000373121	"SENSITIVE"		Loss of PNGS N141
"-----A"	"140-145"	"TNSSSG"	0.000355222	"SENSITIVE"		Loss of PNGS N141
"-----A"	"142-147"	"SSSGRM"	0.000346755	"SENSITIVE"		Loss of PNGS N141
"-----A"	"137-142"	"DTNTNS"	0.000324543	"SENSITIVE"		Loss of PNGS N141
"-----A"	"139-144"	"NTNSSS"	0.000320669	"SENSITIVE"		Loss of PNGS N141
"-----A"	"138-143"	"TNTNSS"	0.00031464	"SENSITIVE"		Loss of PNGS N141
"-----A"	"136-141"	"NDTNTN"	0.000281224	"SENSITIVE"		Loss of PNGS N141
"-----A"	"143-148"	"SSGRMI"	0.000258443	"SENSITIVE"		Loss of PNGS N141
"AHCNIW"	"329-334"	"AHCNIS"	0.000241002	"SENSITIVE"	S334W	Loss of PNGS N332?? But intact QAHCN at 328?
"RQAHCR"	"327-332"	"RQAHCN"	0.000235669	"SENSITIVE"		Loss of PNGS N332?? But intact QAHC at 328?
"QAHCNA"	"328-333"	"QAHCNI"	0.000235669	"SENSITIVE"		PNGS 332 intact
"IGDIDI"	"323-328"	"IGNMRQ"	0.000232945	"SENSITIVE"		Loss of PNGS N332?? But intact QAHC at 328?
"HCNIFC"	"330-335"	"HCNISR"	0.000221151	"SENSITIVE"		Loss of PNGS N332?? But intact QAHCN at 328?
"IRQAQY"	"326-331"	"MRQAHC"	0.000213651	"SENSITIVE"
"-----A"	"135-140"	"KNDTNT"	0.000211829	"SENSITIVE"
"TRKSLG"	"303-308"	"TRKRIR"	0.000207831	"SENSITIVE"
"AISLLQ"	"811-816"	"AVSLLN"	-0.00020628	"RESISTANT"	V812I and N816Q	Loss of PNGS 816
"ITGIIL"	"449-454"	"ITGLLL"	-0.000205349	"RESISTANT"	LL452II
"ISLLNP"	"812-817"	"VSLLNA"	-0.000197368	"RESISTANT"	V812I and A817P	Loss of PNGS 816 due to P
"----SE"	"131_10-133"	"----TD"	0.00019528	"SENSITIVE"
"VEQMLH"	"101-106"	"VEQMHE"	0.000194145	"SENSITIVE"
"DKKQFT"	"167-172"	"GKVQKE"	-0.000190287	"RESISTANT"
"NIPRDK"	"842-847"	"HIPRRI"	0.000190024	"SENSITIVE"
"KLFNVE"	"389-393"	"QLFNNS"	-0.000188665	"RESISTANT"		Loss of PNGS 392
"NQQEKA"	"651-656"	"NQQEKN"	0.000187677	"SENSITIVE"
"-----A"	"134-139"	"LKNDTN"	0.000185331	"SENSITIVE"
"TGLLIH"	"450-455"	"TGLLLT"	0.000184533	"SENSITIVE"
"-----A"	"459_3-461"	"----NS"	-0.000184492	"RESISTANT"		Loss of PNGS N460
"DIREVD"	"325-330"	"NMRQAH"	0.000184253	"SENSITIVE"
"KDLLQA"	"658-663"	"QELLEL"	-0.000183331	"RESISTANT"	Q658K/E659D/E662Q/L663A	Loss of E659?
"DLLEHC"	"659-664"	"ELLELD"	-0.000183331	"RESISTANT"		Loss of E659?
"SGKLKQ"	"599-604"	"SGKLIC"	0.000177492	"SENSITIVE"
"GKLIEY"	"600-605"	"GKLICT"	0.000177492	"SENSITIVE"
"QNQQES"	"650-655"	"QNQQEK"	0.000176927	"SENSITIVE"
"IIGDLN"	"322_1-327"	"-IGNMR"	0.000174356	"SENSITIVE"
"-----A"	"400_3-404"	"--STEG"	-0.000173379	"RESISTANT"
"LICTWC"	"602-607"	"LICTTA"	0.000173269	"SENSITIVE"
"GLLLWQ"	"451-456"	"GLLLTR"	0.000172592	"SENSITIVE"
"-----A"	"133_12-138"	"-LKNDT"	0.000172268	"SENSITIVE"
"GNITQA"	"441-446"	"GQIRCS"	0.000172253	"SENSITIVE"
"DAETTA"	"47-52"	"EATTTL"	-0.000171214	"RESISTANT"
"-----A"	"400_2-403"	"---STE"	-0.000169974	"RESISTANT"
"LLELDN"	"660-665"	"LLELDK"	-0.000169573	"RESISTANT"	K665N
"KLICWI"	"601-606"	"KLICTT"	0.000166492	"SENSITIVE"
"VPWNSF"	"608-613"	"VPWNAS"	-0.000163606	"RESISTANT"	AS612SF	Loss of PNGS at 611
"-----A"	"144-149"	"SGRMIM"	0.000163427	"SENSITIVE"
"EQDRCR"	"739-744"	"ERDRDR"	-0.000163263	"RESISTANT"	R740Q/D743C
"RTVELI"	"780-785"	"RIVELL"	-0.000161781	"RESISTANT"	I780T/L785I

## Sheet: PGT128_1%DiscSignal
l-mer	HXB2 positions	HXB2 Aas	Normalized Weight	Association	To read as	Interpretation
"----"	"145_6-145_9"	"----"	-0.000140593	"RESISTANT"	No insertions after G145
"----"	"145_7-145_10"	"----"	-0.000140303	"RESISTANT"	No insertions after G145
"----"	"145_5-145_8"	"----"	-0.000138591	"RESISTANT"	No insertions after G145
"----"	"145_8-146"	"---R"	-0.000137837	"RESISTANT"	Loss of R 146	Loss of RMIME pattern
"----"	"145_4-145_7"	"----"	-0.00013419	"RESISTANT"	No insertions after G145
"----"	"145_9-147"	"--RM"	-0.000133306	"RESISTANT"	No insertions after G145/Loss of RM146	Loss of RMIME pattern
"----"	"145_3-145_6"	"----"	-0.000127323	"RESISTANT"	No insertions after G145
"----"	"145_10-148"	"-RMI"	-0.000126831	"RESISTANT"	Loss of RMI146	Loss of RMIME pattern
"----"	"401_1-404"	"-TEG"	-0.000123273	"RESISTANT"	Loss of TEG402
"----"	"401-403"	"S-TE"	-0.000121765	"RESISTANT"	Loss of S-TE at 401
"----"	"402-405"	"TEGS"	-0.000121714	"RESISTANT"	Loss of TEGS402
"----"	"146-149"	"RMIM"	-0.000118569	"RESISTANT"	Loss of RMIM146	Loss of RMIME pattern
"----"	"136-138_1"	"NDT-"	-0.000118258	"RESISTANT"	Loss of NDT136	Loss of PNGS136
"----"	"145_2-145_5"	"----"	-0.00011801	"RESISTANT"	No insertions after G145
"----"	"400-402"	"WS-T"	-0.000117723	"RESISTANT"	Loss of WS-T at 400
"----"	"137-138_2"	"DT--"	-0.000116766	"RESISTANT"		Loss of PNGS136
"----"	"403-406"	"EGSN"	-0.000116751	"RESISTANT"		Loss of PNGS406
"----"	"135_17-138"	"-NDT"	-0.000113986	"RESISTANT"		Loss of PNGSN136
"----"	"399-401_1"	"TWS-"	-0.000111767	"RESISTANT"		Loss of PNGS N397
"----"	"138-138_3"	"T---"	-0.000109754	"RESISTANT"		Loss of PNGS N136
"----"	"147-150"	"MIME"	-0.000108742	"RESISTANT"		Loss of RMIME pattern
"----"	"404-407"	"GSNN"	-0.000108349	"RESISTANT"		Loss of PNGS N406
"----"	"145_1-145_4"	"----"	-0.00010641	"RESISTANT"	No insertions after G145
"----"	"398-401"	"STWS"	-0.000104495	"RESISTANT"	Loss of STWS at 398	Loss of PNGS N397
"----"	"135_16-137"	"--ND"	-0.000104318	"RESISTANT"		Loss of PNGS N136
"----"	"138_1-138_4"	"----"	-9.80465e-05	"RESISTANT"	T138
"----"	"148-150_1"	"IME-"	-9.76542e-05	"RESISTANT"		Loss of RMIME pattern
"----"	"405-408"	"SNNT"	-9.68324e-05	"RESISTANT"		Loss of PNGS N406
"----"	"397-400"	"NSTW"	-9.64199e-05	"RESISTANT"		Loss of PNGS N397
"----"	"145-145_3"	"G---"	-9.28654e-05	"RESISTANT"	Loss of G145	Loss of NSSSG pattern
"----"	"135_15-136"	"---N"	-9.01694e-05	"RESISTANT"		Loss of PNGS N136
"----"	"396-399"	"FNST"	-8.79434e-05	"RESISTANT"		Loss of PNGS N397
"----"	"186_4-186_7"	"----"	8.59493e-05	"SENSITIVE"	No insertions after N186	intact PNGS at N186
"----"	"149-150_2"	"ME--"	-8.56973e-05	"RESISTANT"		Loss of RMIME pattern
"----"	"186_5-186_8"	"----"	8.51488e-05	"SENSITIVE"	No insertions after N186	intact PNGS at N186
"----"	"138_2-138_5"	"----"	-8.29418e-05	"RESISTANT"	No insertion after T138	No shift of T138?
"----"	"406-409"	"NNTE"	-8.28788e-05	"RESISTANT"		Loss of PNGS N406
"----"	"186_3-186_6"	"----"	8.23325e-05	"SENSITIVE"	No insertions after N186	intact PNGS at N186
"----"	"186_6-186_9"	"----"	7.98564e-05	"SENSITIVE"	No insertions after N186	intact PNGS at N186
"----"	"395_4-398"	"-FNS"	-7.93666e-05	"RESISTANT"		Loss of PNGS N397
"----"	"144-145_2"	"SG--"	-7.79211e-05	"RESISTANT"		Loss of NSSSG pattern
"----"	"186_2-186_5"	"----"	7.48985e-05	"SENSITIVE"	No insertions after N186	intact PNGS at N186
"----"	"150-150_3"	"E---"	-7.33257e-05	"RESISTANT"		Loss of E150
"----"	"135_14-135_17"	"----"	-7.28545e-05	"RESISTANT"	No insertions before N136
"INCT"	"294-297"	"INCT"	7.24876e-05	"SENSITIVE"		INCT294 important for sensitivity, even if PNGS N295 is shifted
"NCTR"	"295-298"	"NCTR"	7.24876e-05	"SENSITIVE"		INCT294 important for sensitivity, even if PNGS N295 is shifted
"INCT"	"293-296"	"EINC"	7.10522e-05	"SENSITIVE"		INCT294 important for sensitivity, even if PNGS N295 is shifted
"NCTR"	"294-297"	"INCT"	7.10522e-05	"SENSITIVE"		INCT294 important for sensitivity, even if PNGS N295 is shifted
"INCT"	"295-298"	"NCTR"	7.10522e-05	"SENSITIVE"		INCT294 important for sensitivity, even if PNGS N295 is shifted
"NCTR"	"296-299"	"CTRP"	7.10522e-05	"SENSITIVE"		INCT294 important for sensitivity, even if PNGS N295 is shifted
"----"	"395_3-397"	"--FN"	-7.09182e-05	"RESISTANT"		Loss of PNGS N397
"----"	"186_7-186_10"	"----"	7.0558e-05	"SENSITIVE"	No insertions after N186	intact PNGS at N186
"----"	"407-410"	"NTEG"	-6.74414e-05	"RESISTANT"		Loss of PNGS N406
"INCT"	"292-295"	"VEIN"	6.69145e-05	"SENSITIVE"		INCT294 important for sensitivity, even if PNGS N295 is shifted
"NCTR"	"293-296"	"EINC"	6.69145e-05	"SENSITIVE"		INCT294 important for sensitivity, even if PNGS N295 is shifted
"INCT"	"296-299"	"CTRP"	6.69145e-05	"SENSITIVE"		INCT294 important for sensitivity, even if PNGS N295 is shifted
"NCTR"	"297-300"	"TRPN"	6.69145e-05	"SENSITIVE"		INCT294 important for sensitivity, even if PNGS N295 is shifted
"----"	"133_4-133_7"	"----"	6.68712e-05	"SENSITIVE"	no insertions after D133?
"----"	"133_3-133_6"	"----"	6.67603e-05	"SENSITIVE"	no insertions after D133?
"----"	"138_3-139"	"---N"	-6.60321e-05	"RESISTANT"	Loss of N139
"----"	"133_5-133_8"	"----"	6.50149e-05	"SENSITIVE"	no insertions after D133?	Loss of D133?
"----"	"133_2-133_5"	"----"	6.46588e-05	"SENSITIVE"	no insertions after D133?	Loss of D133?
"----"	"186_1-186_4"	"----"	6.46465e-05	"SENSITIVE"	No insertions after N186	intact PNGS at N186
"----"	"395_2-396"	"---F"	-6.27823e-05	"RESISTANT"	Loss of F396	Influence on loss of N397?
"----"	"143-145_1"	"SSG-"	-6.23197e-05	"RESISTANT"		Loss of NSSSG pattern
"----"	"133_6-133_9"	"----"	6.14164e-05	"SENSITIVE"
"----"	"150_1-150_4"	"----"	-6.10183e-05	"RESISTANT"	No insertions after E150 or No shift of E150?
"----"	"133_1-133_4"	"----"	6.07356e-05	"SENSITIVE"	no insertions after D133?
"INCT"	"291-294"	"SVEI"	6.05467e-05	"SENSITIVE"		INCT294 important for sensitivity, even if PNGS N295 is shifted
"NCTR"	"292-295"	"VEIN"	6.05467e-05	"SENSITIVE"		INCT294 important for sensitivity, even if PNGS N295 is shifted
"INCT"	"297-300"	"TRPN"	6.05467e-05	"SENSITIVE"		INCT294 important for sensitivity, even if PNGS N295 is shifted
"NCTR"	"298-301"	"RPNN"	6.05467e-05	"SENSITIVE"		INCT294 important for sensitivity, even if PNGS N295 is shifted
"AHCN"	"329-332"	"AHCN"	6.01007e-05	"SENSITIVE"		PNGS 332 important, but it is even the pattern AHCN that matters more
"AHCN"	"328-331"	"QAHC"	5.89107e-05	"SENSITIVE"
"AHCN"	"330-333"	"HCNI"	5.89107e-05	"SENSITIVE"
"----"	"186_8-186_11"	"----"	5.82339e-05	"SENSITIVE"	No insertions after N186	intact PNGS at N186
"HCNI"	"330-333"	"HCNI"	5.69342e-05	"SENSITIVE"		intact PNGS at N332, intact pattern AHCN
"----"	"133_7-133_10"	"----"	5.64849e-05	"SENSITIVE"
"HCNI"	"329-332"	"AHCN"	5.58068e-05	"SENSITIVE"		intact pattern HCN, PNGS shifted
"HCNI"	"331-334"	"CNIS"	5.58068e-05	"SENSITIVE"		intact pattern HCN, PNGS shifted
"AHCN"	"327-330"	"RQAH"	5.548e-05	"SENSITIVE"		intact pattern HCN, PNGS shifted
"AHCN"	"331-334"	"CNIS"	5.548e-05	"SENSITIVE"		intact pattern HCN, PNGS shifted
"----"	"133-133_3"	"D---"	5.53183e-05	"SENSITIVE"	Loss of D133
"----"	"395_1-395_4"	"----"	-5.51137e-05	"RESISTANT"
"----"	"135_13-135_16"	"----"	-5.38918e-05	"RESISTANT"	No insertions before N136
"CNIS"	"331-334"	"CNIS"	5.32314e-05	"SENSITIVE"
"----"	"186-186_3"	"N---"	5.27924e-05	"SENSITIVE"
"INCT"	"290-293"	"TSVE"	5.26368e-05	"SENSITIVE"		INCT294 important for sensitivity, even if PNGS N295 is shifted
"NCTR"	"291-294"	"SVEI"	5.26368e-05	"SENSITIVE"		INCT294 important for sensitivity, even if PNGS N295 is shifted
"INCT"	"298-301"	"RPNN"	5.26368e-05	"SENSITIVE"		INCT294 important for sensitivity, even if PNGS N295 is shifted
"NCTR"	"299-302"	"PNNN"	5.26368e-05	"SENSITIVE"		INCT294 important for sensitivity, even if PNGS N295 is shifted
"HCNI"	"328-331"	"QAHC"	5.25569e-05	"SENSITIVE"		shift of pattern upwards
"HCNI"	"332-335"	"NISR"	5.25569e-05	"SENSITIVE"		PNGS at 334
"CNIS"	"330-333"	"HCNI"	5.21774e-05	"SENSITIVE"
"CNIS"	"332-335"	"NISR"	5.21774e-05	"SENSITIVE"
"----"	"408-410_1"	"TEG-"	-5.16199e-05	"RESISTANT"		Loss of PNGS N406
"----"	"133_8-133_11"	"----"	5.07688e-05	"SENSITIVE"
"AHCN"	"326-329"	"MRQA"	5.02004e-05	"SENSITIVE"		shift of pattern upwards
"AHCN"	"332-335"	"NISR"	5.02004e-05	"SENSITIVE"		shift of pattern downwards
"RIIE"	"828-831"	"RVIE"	-5.00646e-05	"RESISTANT"	V829I
"----"	"150_2-150_5"	"----"	-4.92308e-05	"RESISTANT"	No insertions after E150 or No shift of E150?
"CNIS"	"329-332"	"AHCN"	4.91388e-05	"SENSITIVE"		shift of pattern upwards
"CNIS"	"333-336"	"ISRA"	4.91388e-05	"SENSITIVE"		shift of pattern downwards
"RIIE"	"827-830"	"DRVI"	-4.90733e-05	"RESISTANT"	V829I
"RIIE"	"829-832"	"VIEV"	-4.90733e-05	"RESISTANT"		Loss of V
"----"	"138_4-139_1"	"--N-"	-4.90066e-05	"RESISTANT"
"----"	"132-133_2"	"TD--"	4.88426e-05	"SENSITIVE"
"CTRP"	"296-299"	"CTRP"	4.84699e-05	"SENSITIVE"
"----"	"395-395_3"	"W---"	-4.80372e-05	"RESISTANT"	Loss of W395	Influence on PNGS 392, influence on NSTWFNST pattern
"HCNI"	"327-330"	"RQAH"	4.75554e-05	"SENSITIVE"
"HCNI"	"333-336"	"ISRA"	4.75554e-05	"SENSITIVE"
"CTRP"	"295-298"	"NCTR"	4.75101e-05	"SENSITIVE"
"CTRP"	"297-300"	"TRPN"	4.75101e-05	"SENSITIVE"
"----"	"142-145"	"SSSG"	-4.69649e-05	"RESISTANT"		Loss of SSSG pattern
"RIIE"	"826-829"	"TDRV"	-4.62155e-05	"RESISTANT"		Loss of V
"RIIE"	"830-833"	"IEVV"	-4.62155e-05	"RESISTANT"		Loss of V
"----"	"133_9-134"	"---L"	4.48878e-05	"SENSITIVE"
"CTRP"	"294-297"	"INCT"	4.47434e-05	"SENSITIVE"
"CTRP"	"298-301"	"RPNN"	4.47434e-05	"SENSITIVE"
"CNIS"	"328-331"	"QAHC"	4.44626e-05	"SENSITIVE"
"CNIS"	"334-337"	"SRAK"	4.44626e-05	"SENSITIVE"
"----"	"186_9-186_12"	"----"	4.42018e-05	"SENSITIVE"
"INCT"	"289-292"	"NTSV"	4.39659e-05	"SENSITIVE"
"NCTR"	"290-293"	"TSVE"	4.39659e-05	"SENSITIVE"
"INCT"	"299-302"	"PNNN"	4.39659e-05	"SENSITIVE"
"NCTR"	"300-303"	"NNNT"	4.39659e-05	"SENSITIVE"
"S-SG"	"364-366"	"S-SG"	4.36606e-05	"SENSITIVE"
"AHCN"	"325-328"	"NMRQ"	4.36421e-05	"SENSITIVE"
"AHCN"	"333-336"	"ISRA"	4.36421e-05	"SENSITIVE"
"S-SG"	"363-365"	"QS-S"	4.2796e-05	"SENSITIVE"
"S-SG"	"364_1-367"	"-SGG"	4.2796e-05	"SENSITIVE"
"RIIE"	"825-828"	"GTDR"	-4.18175e-05	"RESISTANT"
"RIIE"	"831-834"	"EVVQ"	-4.18175e-05	"RESISTANT"
"----"	"131-133_1"	"CTD-"	4.17933e-05	"SENSITIVE"
"----"	"394-395_2"	"TW--"	-4.1636e-05	"RESISTANT"		Loss of PNGS N392
"HCNI"	"326-329"	"MRQA"	4.13427e-05	"SENSITIVE"
"HCNI"	"334-337"	"SRAK"	4.13427e-05	"SENSITIVE"
"RQAH"	"327-330"	"RQAH"	4.12967e-05	"SENSITIVE"
"QAHC"	"328-331"	"QAHC"	4.12967e-05	"SENSITIVE"
"T--G"	"320-321"	"I--G"	4.06211e-05	"SENSITIVE"
"----"	"185-186_2"	"DN--"	4.05679e-05	"SENSITIVE"
"CTRP"	"293-296"	"EINC"	4.04855e-05	"SENSITIVE"
"CTRP"	"299-302"	"PNNN"	4.04855e-05	"SENSITIVE"
"RQAH"	"326-329"	"MRQA"	4.0479e-05	"SENSITIVE"
"QAHC"	"327-330"	"RQAH"	4.0479e-05	"SENSITIVE"

[truncated: 1 more sheets: VRC-PG04_1%DiscSignals]
